# Supplementary material for: Transposon Mutagenesis of Pseudomonas syringae Pathovars syringae and morsprunorum to Identify Genes Involved in Bacterial Canker Disease of Cherry
Source: MDPI journal article supplement (doi:10.3390/microorganisms9061328), 2021-06-18
Supplement: s1 [file s1]

**Table S3. Presence of selected mutant genes in the other strains used in this study.**

| <b>Mutant number</b>       |                         |                        |
|----------------------------|-------------------------|------------------------|
| <b><i>Pss</i> 9644</b>     | <b>Present in MH001</b> | <b>Present in 5244</b> |
| 1.38                       | Y                       | Y                      |
| 3.15                       | Y                       | Y                      |
| 5.18                       | N                       | Y                      |
| 6.08                       | Y                       | Y                      |
| 11.18                      | Y                       | Y                      |
| 12.36                      | N                       | N                      |
| <b><i>Psm</i> R1 5244</b>  | <b>Present in MH001</b> | <b>Present in 9644</b> |
| 20.17                      | Y                       | Y                      |
| <b><i>Psm</i> R2 MH001</b> | <b>Present in 5244</b>  | <b>Present in 9644</b> |
| 3.17                       | Y                       | Y                      |
| 3.27                       | Y                       | Y                      |
| 4.02                       | Y                       | Y                      |
| 4.14                       | Y                       | Y                      |
| 5.42                       | Y                       | Y                      |
| 6.37                       | N                       | Y                      |
| 7.43                       | Y                       | Y                      |
| 8.11                       | Y                       | Y                      |
| 9.16                       | Y                       | Y                      |
| 9.46                       | N                       | N                      |
| 15.32                      | Y                       | Y                      |

Y: Yes, N: No. Analysis carried out using NCBI Blast. *Psm*; *Pseudomonas syringae* pv. *morsprunorum*, *Pss*; *P. syringae* pv. *syringae*.
