# Supplementary material for: Transposon Mutagenesis of Pseudomonas syringae Pathovars syringae and morsprunorum to Identify Genes Involved in Bacterial Canker Disease of Cherry
Source: MDPI journal article supplement (doi:10.3390/microorganisms9061328), 2021-06-18
Supplement: s1 [file s1]

**Table S1. PCR Primers used in this study.**

| <b>Primer name</b> | <b>Target gene or location</b>                     | <b>Sequence 5'-3'</b>                           |
|--------------------|----------------------------------------------------|-------------------------------------------------|
| 9644-1.38          | Adenine DNA glycosylase                            | CGACTCACATCTCGACGAG<br>TTGCGGCACATTACGGTGCG     |
| 9644-3.15          | Serine<br>hydroxymethyltransferase 2               | TTGAGGACTGCCATGTTTCAG<br>CTCATCAAGCGCCGTAAACC   |
| 9644-5.18          | Glycosyl transferase family 1                      | TTTCATCAGCAGGACGCTCA<br>CGTTGCTGTTGTGGGTTCAG    |
| 9644-6.08          | Pyridoxine/pyridoxamine 5'-<br>phosphate oxidase   | TCGATCCGTGCCCTCGCAG<br>GCTCAGACGATTGGCCAAAC     |
| 9644-11.18         | Na(+)/H(+) antiporter NhaA                         | GCAGCGATCAATCGTCCAG<br>ATAATCGAACCCTGGAGAACC    |
| 9644-12.36         | Arginine-ornithine antiporter                      | CGATAAGGGTCAGCAGGCC<br>TCGCTCATGTCGTCGACCTG     |
| 5244-20.17         | Acetylornithine decacetylase                       | TTACAGGAAGCGCCCATGCC<br>GTTGATAGTACCGGGCTCAC    |
| MH001-3.17         | Molecular chaperone DnaJ                           | CCACAAACAGAAAATGCCCTC<br>ATGGACAGCTAGTGAATGC    |
| MH001-3.27         | MFS transporter                                    | GGACGATGAGCCAACAGTC<br>TATGGAGCTGAGTATGCAGG     |
| MH001-4.02         | Ornithine<br>carbamoyltransferase                  | AGGTAGTTAATCATGAACGCC<br>TCAGCAGCAACTGACTCATG   |
| MH001-4.14         | Phosphoglycerate mutase, 2,3-<br>bisphosphoglycate | CATCGAGTGGGTTCTATGAC<br>GCTATAGGCCGGTTTTCACC    |
| MH001-5.42         | DNA ligase D                                       | TACGGAGAAACGGCCATGG<br>CCGCCTGATTTC AAGGCCG     |
| MH001-6.37         | Beta-glucosidase                                   | TCATTGAGCGGAGGCTTAC<br>GAACAAGCGAAAGATGATAGG    |
| MH001-7.43         | HrcS T3SS protein                                  | AACGCCAACGCTTCCATGAC<br>CGGCTCAGCCATGATCATG     |
| MH001-8.11         | Cu <sup>+</sup> exporting protein                  | AGAACTCATGACCGATGAAGC<br>ATGGCATGGCACAGGAACAATC |
| MH001-9.16         | Acetolactate synthase                              | AATGGCCTGAACGGCCACG<br>AAACGCGACCGATTGGCCG      |
| MH001-9.46         | Type III effector HopAU1                           | GGGCAAGAAGCGTCATGCTC<br>CCTTATTCTGCTGCGTGCG     |
| MH001-15.32        | Flagellar hook-length protein<br>FliK              | CAAGGCGCTCATGCTGAAAG<br>AGGTTAAGTGACGATGCCGG    |
| TnphoAII-F         | IS-Ω-Km/hah specific primer                        | GTGTGCAGTAATATCGCCCTGAGCA                       |
| CEKG2A             | IS-Ω-Km/hah arbitrary primer                       | GGCCACGCGTCGACTAGTACNNNNNNN<br>NNNAGAG          |
| CEKG2B             | IS-Ω-Km/hah arbitrary primer                       | GGCCACGCGTCGACTAGTACNNNNNNN<br>NNNACGCC         |
| CEKG2C             | IS-Ω-Km/hah arbitrary primer                       | GGCCACGCGTCGACTAGTACNNNNNNN<br>NNNGATAT         |
| Hah-1-F            | IS-Ω-Km/hah specific primer                        | ATCCCCCTGGATGGAAAACGG                           |
| CEKG4              | IS-Ω-Km/hah arbitrary primer                       | GGCCACGCGTCGACTAGTAC                            |
